# Supplementary material for: Measurement report: Rapid changes of chemical characteristics and health risks for highly time resolved trace elements in PM 2.5 in a typical industrial city in response to stringent clean air actions
Source: Copernicus journal article supplement (doi:10.5194/acp-23-4709-2023), 2023-04-20
Supplement: Supplementary file 1 [file acp-23-4709-2023-supplement.pdf]

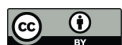

*Supplement of*

**Measurement report: Rapid changes of chemical characteristics and health risks for highly time resolved trace elements in PM<sub>2.5</sub> in a typical industrial city in response to stringent clean air actions**

**Rui Li et al.**

*Correspondence to:* Rui Li (rli@geo.ecnu.edu.cn), Meng Peng (mvponesky@163.com), and Weidong Zhao (zhaoweidong@ccidthinktank.com)

The copyright of individual parts of the supplement might differ from the article licence.

### **Detailed clean air actions in China since 2013**

Since 2013, the Chinese government imposed many emission controls to alleviate the air pollution across China. First of all, the government department enhanced a comprehensive air pollution control on industrial enterprises, non-point source control, and vehicle pollution control (Ma et al., 2019). Secondly, many industrial enterprises were required to upgrade their industrial structure, to control new capacity with high energy consumption and to accelerate the elimination of backward production capacity (Li et al., 2021). Thirdly, the energy structure adjustment and utilization of clean energy were also accelerated. The fossil fuel consumption also has been strictly controlled and it was tried to improve the energy efficiency (Ma et al., 2019). In addition, the Chinese governments tried to optimize the industrial layout (Ma et al., 2019). The Chinese government also established the market mechanisms to improve pricing and tax policy (Li et al., 2021). At last, many monitoring sites were constructed across China to investigate the near-time air pollution and the joint prevention and control measures were also enhanced.

**Figure S1** Monthly average values of WS (m/s), T (°C), relative humidity (RH) (%) and air pressure (P) (hPa) during the sampling period. The blue, green, orange, and pink bobbles denote WS, T, RH, and P, respectively.

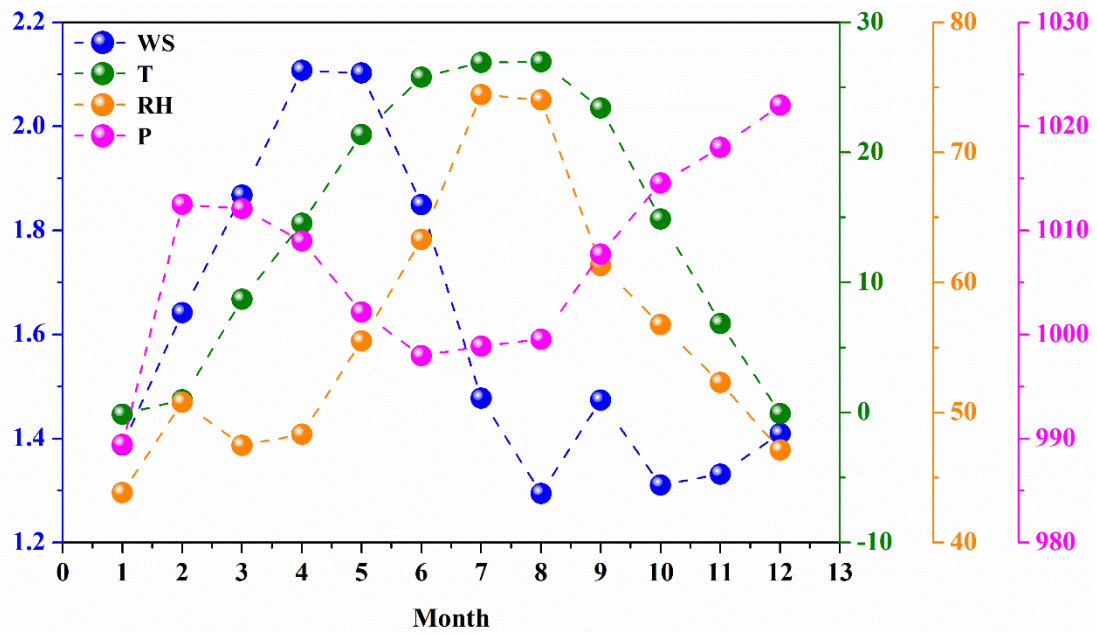

**Figure S2** Time-series for Ag (a), As (b), Ca (c), Co (d), Cr (e), Cu (f), Fe (g), and Ga (h) during 2017-2020 (Unit:  $\text{ng}/\text{m}^3$ ).

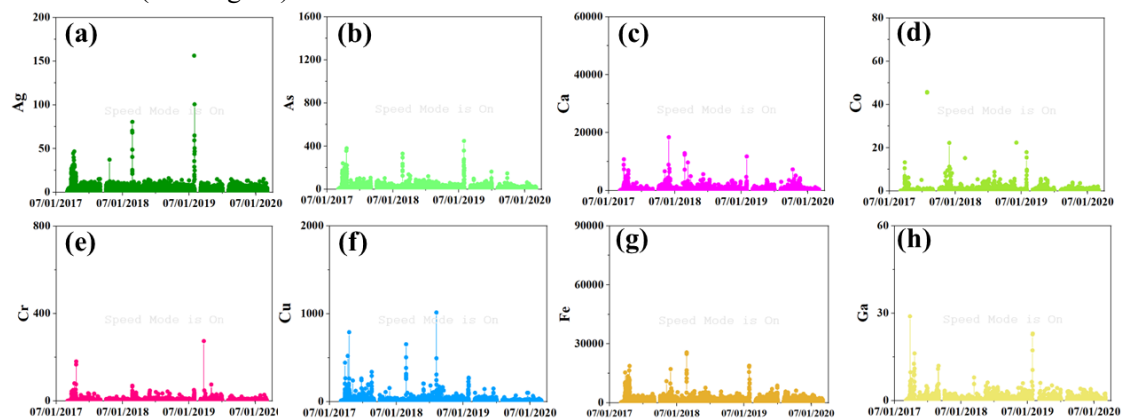

**Figure S3** Time-series for Hg (a), K (b), Mn (c), Ni (d), Pb (e), Se (f), V (g), and Zn (h) during 2017-2020 (Unit:  $\text{ng}/\text{m}^3$ ).

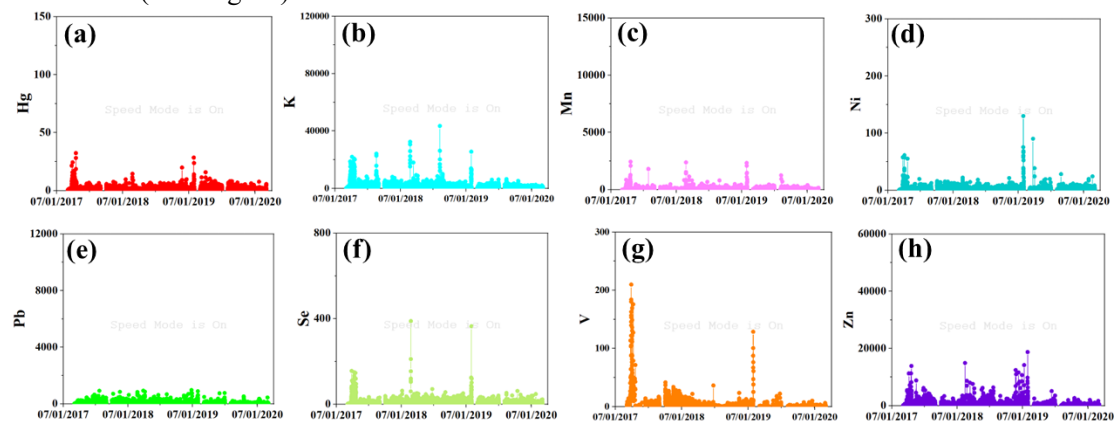

**Figure S4** Performance of the random forest model in predicting the hourly concentrations of gaseous pollutants. The model was constructed with 80% of the original data and the remained data was used to validate the model. The black solid line denotes the best-fitting curve for all of the points, while the black dashed line represents the diagonal, which means the same observed and simulated values. (a)-(p) represent the predictive performances for Ag, As, Ca, Co, Cr, Cu, Fe, Ga, Hg, K, Mn, Ni, Pb, Se, V, and Zn, respectively (Unit: ng/m<sup>3</sup>).

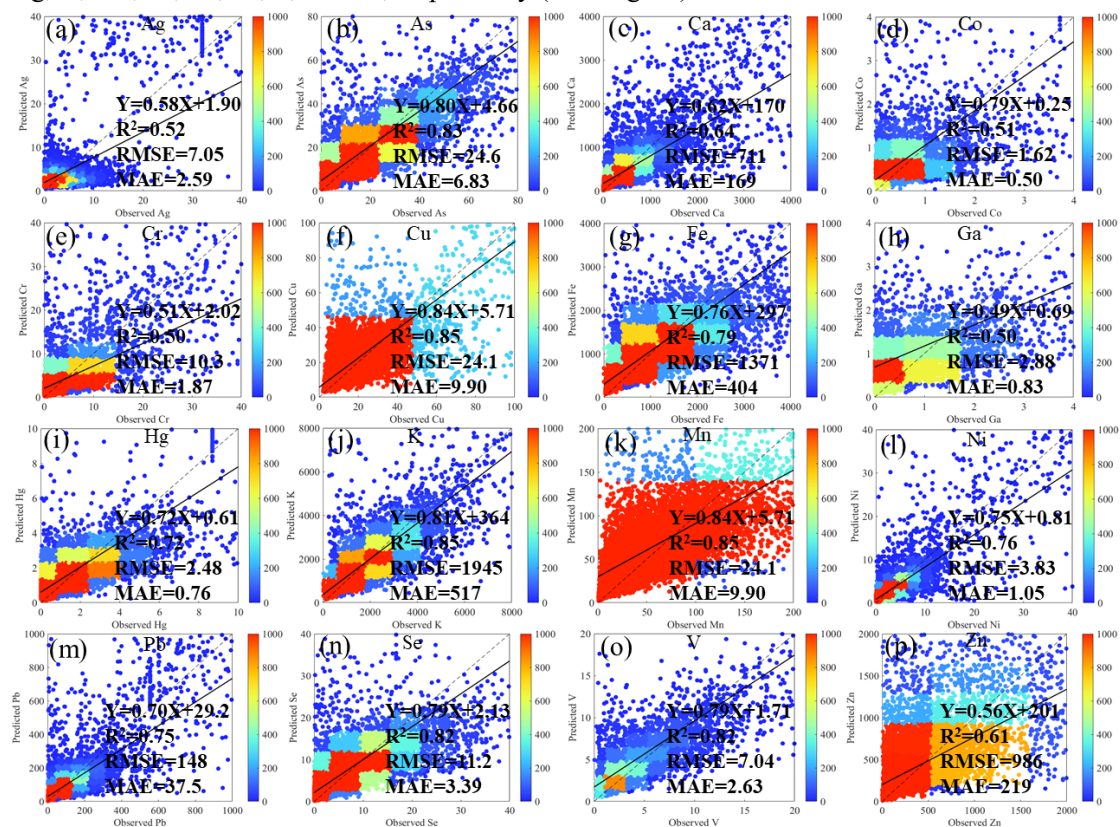

**Figure S5** Changes in observed concentrations of trace elements from 2017 to 2020 against the changes derived from the emission and meteorological changes. The blue, orange, and green columns denote the original concentrations, emission-induced concentrations, and meteorology-induced ones, respectively.

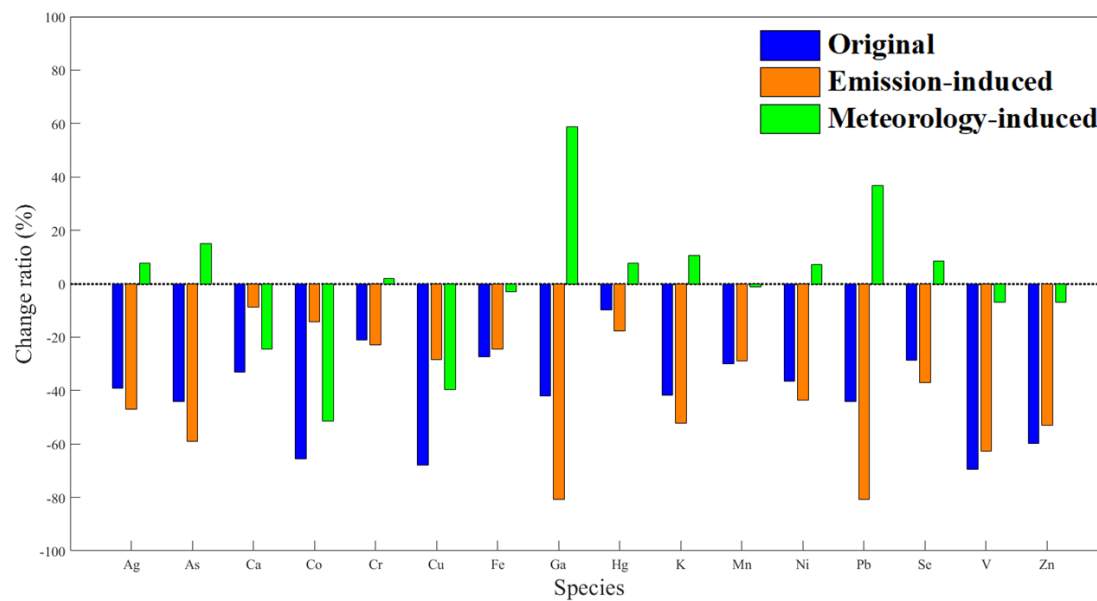

**Figure S6** 72-h backward trajectories arriving at Tangshan during biomass burning episodes in harvesting season (a). Polar plots of K concentration in Tangshan during 2017-2020 (b). The color bar denotes the K concentration (Unit:  $\text{ng}/\text{m}^3$ ).

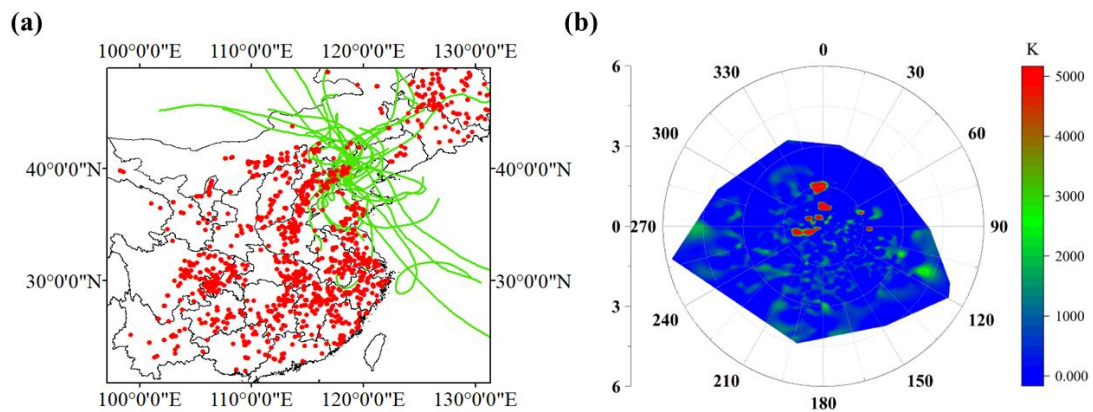



**Figure S7** The 72-h air mass trajectories (a) and cluster result (b) in Tangshan during spring, 2018. The red, green, and blue solid line account for 16%, 55%, and 29% of the total air mass trajectories, respectively.

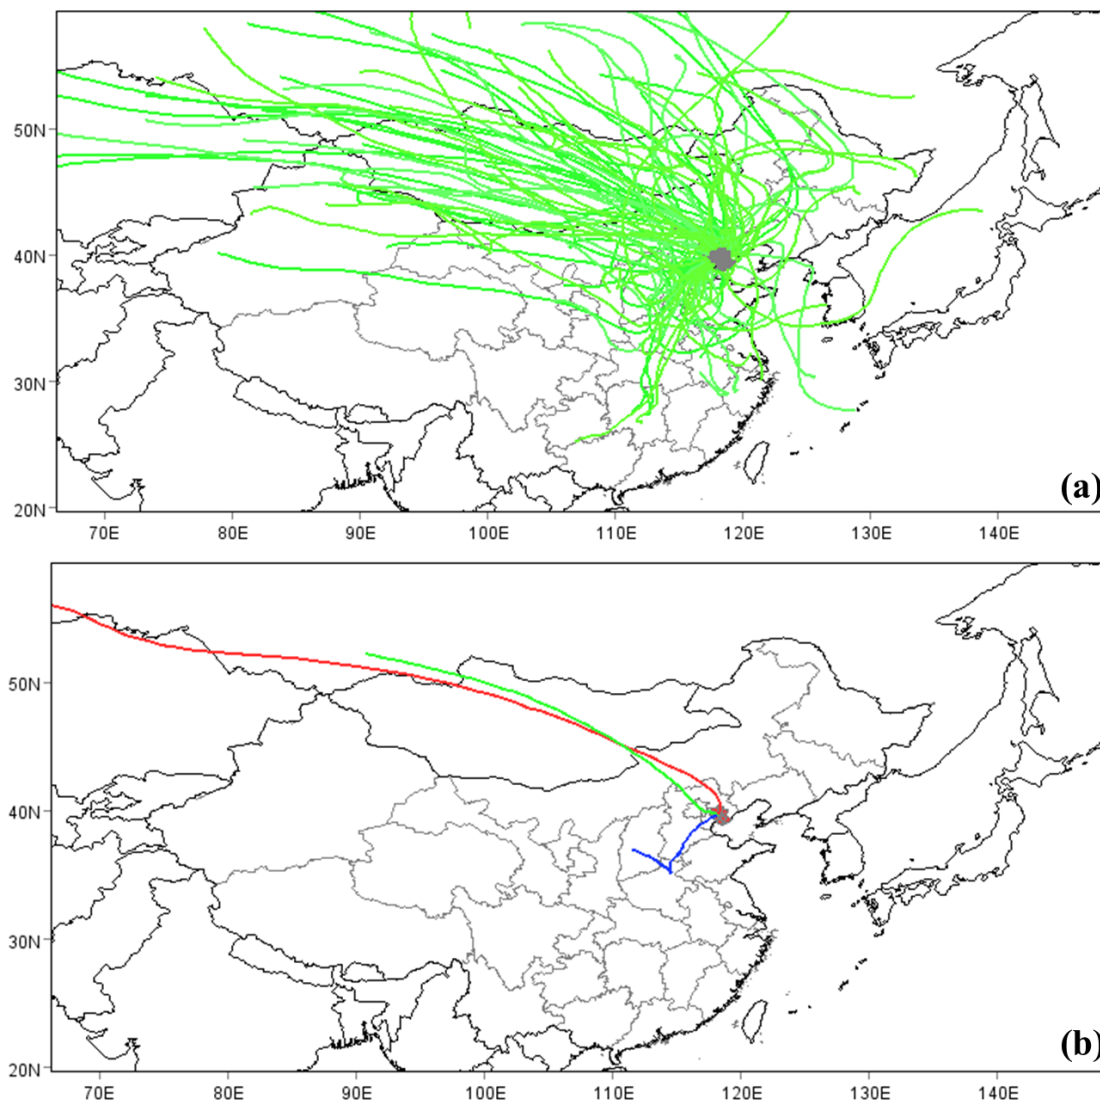

**Figure S8** Polar plots of V (a) and Ni (b) in Tangshan during summer and autumn. The color bar reflects the concentrations of V and Ni (Unit:  $\text{ng}/\text{m}^3$ ).

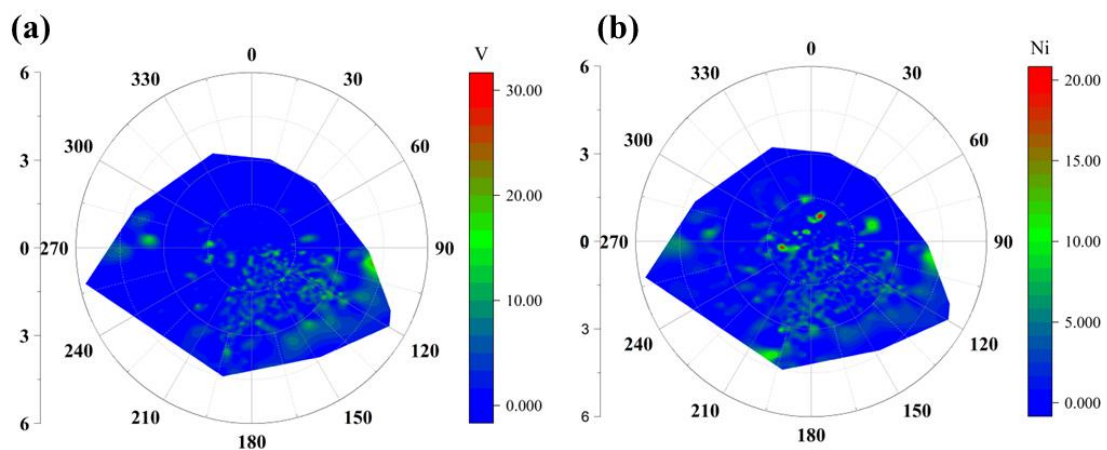

**Figure S9** Source apportionment of trace elements in PM<sub>2.5</sub> during 2017-2020. Red, orange, green, blue, pink, and dark yellow bars denote the sources of biomass burning, non-ferrous metal smelting, coal combustion, ferrous metal smelting, heavy oil combustion, and traffic-related dust, respectively.

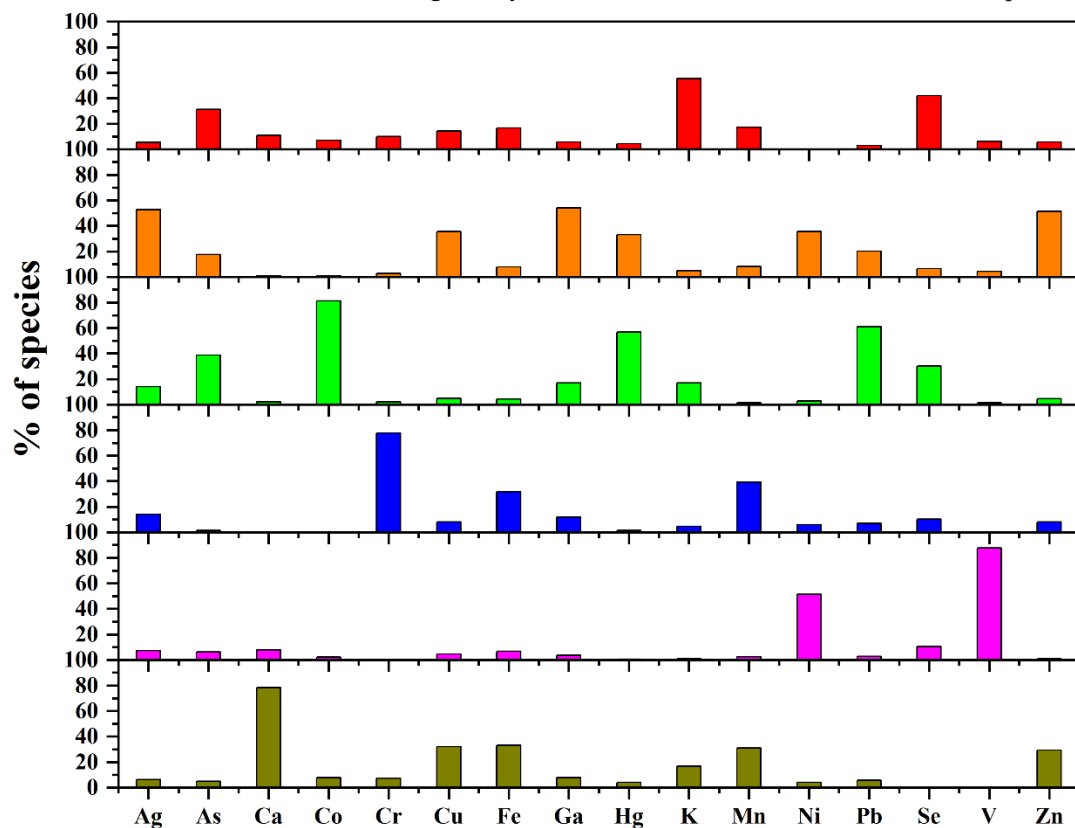

**Figure S10** Diurnal variations of Ca, Fe, Cu, and Zn ( $\text{ng}/\text{m}^3$ ) concentrations in Tangshan during 2017-2020.

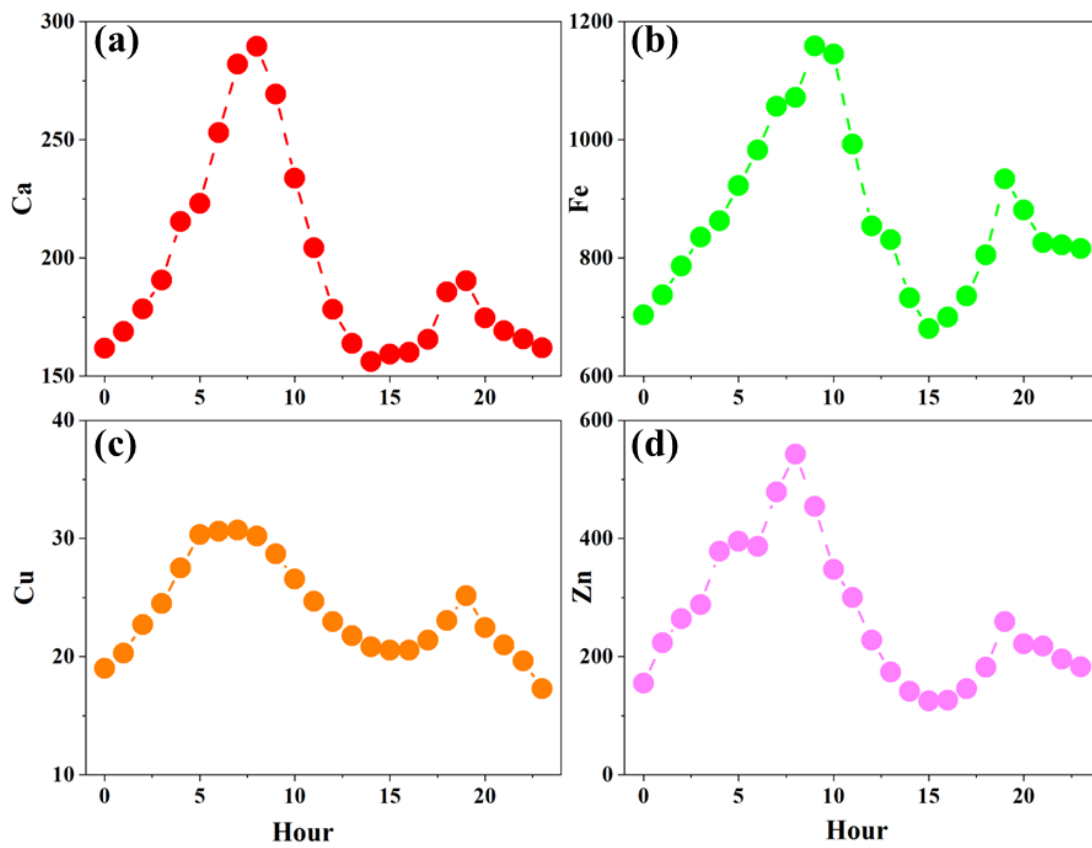

**Table S1** Basic information and data sources of predictors for element estimation in this study.

| Dataset     | Variable          | Unit              | Time resolution | Monitoring technique |
|-------------|-------------------|-------------------|-----------------|----------------------|
| Element     | Ag                | ng/m <sup>3</sup> | Hourly          | Model Xact 625       |
|             | As                | ng/m <sup>3</sup> | Hourly          | Model Xact 625       |
|             | Ca                | ng/m <sup>3</sup> | Hourly          | Model Xact 625       |
|             | Co                | ng/m <sup>3</sup> | Hourly          | Model Xact 625       |
|             | Cr                | ng/m <sup>3</sup> | Hourly          | Model Xact 625       |
|             | Cu                | ng/m <sup>3</sup> | Hourly          | Model Xact 625       |
|             | Fe                | ng/m <sup>3</sup> | Hourly          | Model Xact 625       |
|             | Ga                | ng/m <sup>3</sup> | Hourly          | Model Xact 625       |
|             | Hg                | ng/m <sup>3</sup> | Hourly          | Model Xact 625       |
|             | K                 | ng/m <sup>3</sup> | Hourly          | Model Xact 625       |
|             | Mn                | ng/m <sup>3</sup> | Hourly          | Model Xact 625       |
|             | Ni                | ng/m <sup>3</sup> | Hourly          | Model Xact 625       |
|             | Pb                | ng/m <sup>3</sup> | Hourly          | Model Xact 625       |
|             | Se                | ng/m <sup>3</sup> | Hourly          | Model Xact 625       |
|             | V                 | ng/m <sup>3</sup> | Hourly          | Model Xact 625       |
| Zn          | ng/m <sup>3</sup> | Hourly            | Model Xact 625  |                      |
| Meteorology | T                 | °C                | Hourly          | sonic anemometer     |
|             | RH                | %                 | Hourly          | sonic anemometer     |
|             | WS                | m/s               | Hourly          | sonic anemometer     |
|             | WD                | °                 | Hourly          | sonic anemometer     |
|             | P                 | hPa               | Hourly          | sonic anemometer     |
| Time        | Year              | /                 | Hourly          | /                    |
|             | DOY               | /                 | Hourly          | /                    |
|             | DOW               | /                 | Hourly          | /                    |
|             | HOY               | /                 | Hourly          | /                    |

**Table S2** LOD (ng/m<sup>3</sup>) of each element in PM<sub>2.5</sub> in our study determined by the Model Xact 625.

| Element | LOD  |
|---------|------|
| K       | 1.18 |
| Ca      | 0.56 |
| V       | 0.15 |
| Cr      | 0.14 |
| Mn      | 0.13 |
| Fe      | 0.73 |
| Ni      | 0.20 |
| Cu      | 0.19 |
| Zn      | 0.23 |
| As      | 0.11 |
| Se      | 0.14 |
| Ag      | 0.20 |
| Ga      | 0.05 |
| Co      | 0.05 |
| Hg      | 0.19 |
| Pb      | 0.22 |

**Table S3** Sampling duration, analytical technique, and average concentrations of trace elements in different cities (Unit: ng/m<sup>3</sup>).

|                      | Tangshan       | Beijing            | Shanghai             | Zibo                 | Chengdu             | London                  | Toronto                     | Barcelona               | Genoa                  | Venice                 | Athens                |
|----------------------|----------------|--------------------|----------------------|----------------------|---------------------|-------------------------|-----------------------------|-------------------------|------------------------|------------------------|-----------------------|
| References           | Our study      | (Cui et al., 2019) | (Chang et al., 2018) | (Zhang et al., 2018) | (Wang et al., 2018) | (Visser et al., 2015)   | (Sofowote et al., 2014)     | (Salameh et al., 2015)  | (Salameh et al., 2015) | (Salameh et al., 2015) | (Grivas et al., 2018) |
| Sampling duration    | 2017-2020      | 2016-2017          | 2016-2017            | 2006-2007            | 2014-2015           | 11 Jan. to 14 Feb. 2012 | 1 Dec. 2010 to 30 Nov. 2011 | 20 Sep. to 20 Oct. 2010 | Mar.– Sep. 2011        | Jan.– Dec. 2011        | May 2011 to Apr. 2012 |
| Analytical technique | Model Xact 625 | ED-XRF             | ED-XRF               | WD-XRF               | ED-XRF              | SR-XRF                  | ED-XRF                      | PIXE                    | ED-XRF                 | GFAAS                  | ED-XRF                |
| Sampling site        | Urban          | Urban              | Urban                | Urban                | Urban               | Kerb side               | Industry                    | Road side               | Urban                  | Urban                  | Urban                 |
| K                    | 1400           | 900                | 390                  | 4180                 | 720                 | 27                      | 27                          | 89                      | 100                    | 433                    | 241                   |
| Ca                   | 330            | 493                | 190                  | 1670                 | 240                 | 79                      | 54                          | 109                     | 110                    | 2044                   | 397                   |
| V                    | 4              | 1.1                | 13                   | 8.2                  | 1.9                 | 1.3                     | 0.1                         | 9                       | 14                     | 11                     | 5.8                   |
| Cr                   | 2.8            | 3.6                | 4.5                  | 20                   | 5.6                 | 2.3                     | 0.2                         | 8                       | --                     | 30                     | 1.8                   |
| Mn                   | 54             | 37                 | 32                   | 100                  | 34                  | 4.8                     | 1.8                         | 7                       | 4                      | 91                     | 4.8                   |
| Fe                   | 880            | 738                | 410                  | 1930                 | 456                 | 350                     | 77                          | 96                      | 142                    | 908                    | 320                   |
| Ni                   | 2.2            | 1.6                | 6                    | 11                   | 2.1                 | 0.5                     | 0.2                         | 3                       | 7                      | 26                     | 3.2                   |
| Cu                   | 22             | 32                 | 12                   | 30                   | 19                  | 13                      | 3.1                         | 5                       | 6                      | 84                     | 14                    |
| Zn                   | 320            | 174                | 120                  | 710                  | 238                 | 8.9                     | 11                          | 35                      | 19                     | 77                     | 51                    |
| As                   | 15             | 11                 | 6.6                  | 30                   | 11                  | --                      | 0.3                         | --                      | --                     | --                     | --                    |
| Se                   | 6.5            | 4.1                | 2.6                  | 20                   | --                  | --                      | --                          | --                      | --                     | --                     | --                    |
| Hg                   | 1.5            | 2.5                | 2.2                  | --                   | --                  | --                      | --                          | --                      | --                     | --                     | --                    |
| Pb                   | 58             | 65                 | 27                   | 420                  | 55                  | 2.3                     | 2.4                         | 17                      | 6                      | 41                     | 14                    |

Note. ED-XRF = energy dispersive X-ray fluorescence analysis, PIXE = particle-induced X-ray emission analysis, GFAAS = graphite furnace atomic absorption spectrometry, WD-XRF = wavelength dispersive X-ray fluorescence analysis, SR-XRF = synchrotron radiation-induced X-ray fluorescence analysis.

**Table S4** Summary of PMF error diagnostics based on DISP.

---

|                               |   |
|-------------------------------|---|
| Error Code:                   | 0 |
| The largest decrease<br>in Q: | 0 |
| %dQ                           | 0 |

---

| Swaps by Factor:      | Biomass<br>burning | Non-ferrous<br>metal smelting | Coal combustion | Ferrous metal<br>smelting | Heavy oil<br>combustion | Traffic-related<br>dust |
|-----------------------|--------------------|-------------------------------|-----------------|---------------------------|-------------------------|-------------------------|
| dQ <sub>max</sub> =4  | 0                  | 0                             | 0               | 0                         | 0                       | 0                       |
| dQ <sub>max</sub> =8  | 0                  | 0                             | 0               | 0                         | 0                       | 0                       |
| dQ <sub>max</sub> =15 | 0                  | 0                             | 0               | 0                         | 0                       | 0                       |
| dQ <sub>max</sub> =25 | 0                  | 0                             | 0               | 0                         | 0                       | 0                       |

---



**Table S5** Summary of PMF error diagnostics based on BS.

| BS Mapping<br>( $r \geq 0.6$ )                  | Biomass<br>burning | Non-<br>ferrous<br>metal<br>smelting | Coal<br>combustion | Ferrous<br>metal<br>smelting | Heavy oil<br>combustion | Traffic-<br>related<br>dust | Unmapped |
|-------------------------------------------------|--------------------|--------------------------------------|--------------------|------------------------------|-------------------------|-----------------------------|----------|
| Biomass<br>burning and<br>waste<br>incineration | 100                | 0                                    | 0                  | 0                            | 0                       | 0                           | 0        |
| Non-ferrous<br>metal smelting                   | 0                  | 100                                  | 0                  | 0                            | 0                       | 0                           | 0        |
| Coal<br>combustion                              | 0                  | 0                                    | 100                | 0                            | 0                       | 0                           | 0        |
| Ferrous metal<br>smelting                       | 0                  | 0                                    | 1                  | 98                           | 1                       | 0                           | 0        |
| Heavy oil<br>combustion                         | 0                  | 0                                    | 0                  | 0                            | 100                     | 0                           | 0        |
| Traffic- related<br>dust                        | 0                  | 0                                    | 0                  | 0                            | 0                       | 100                         | 0        |

**Table S6** Summary of PMF error estimation diagnostics from BS-DISP.

|                   |                    |                                      |                 |                           |                         |                          |
|-------------------|--------------------|--------------------------------------|-----------------|---------------------------|-------------------------|--------------------------|
| % of Cases        | 98%                |                                      |                 |                           |                         |                          |
| Accepted:         |                    |                                      |                 |                           |                         |                          |
| Largest Decrease  | -24                |                                      |                 |                           |                         |                          |
| in Q:             |                    |                                      |                 |                           |                         |                          |
| % $dQ$            | -0.01              |                                      |                 |                           |                         |                          |
| # of Decreases in | 1                  |                                      |                 |                           |                         |                          |
| Q:                |                    |                                      |                 |                           |                         |                          |
| # of Swaps in     | 0                  |                                      |                 |                           |                         |                          |
| Best Fit:         |                    |                                      |                 |                           |                         |                          |
| # of Swaps in     | 1                  |                                      |                 |                           |                         |                          |
| DISP:             |                    |                                      |                 |                           |                         |                          |
| Swaps by Factor:  | Biomass<br>burning | Non-<br>ferrous<br>metal<br>smelting | Coal combustion | Ferrous metal<br>smelting | Heavy oil<br>combustion | Traffic- related<br>dust |
| $dQ^{\max=0.5}$   | 0                  | 0                                    | 1               | 0                         | 0                       | 0                        |
| $dQ^{\max=1}$     | 0                  | 0                                    | 1               | 0                         | 0                       | 0                        |
| $dQ^{\max=2}$     | 0                  | 0                                    | 1               | 0                         | 0                       | 0                        |
| $dQ^{\max=4}$     | 0                  | 0                                    | 1               | 0                         | 0                       | 0                        |

**Table S7** Recommended values of the parameters for health risk assessment of trace metals.

| Parameter     | Adult  | Child  | Unit              |
|---------------|--------|--------|-------------------|
| InhR          | 16.5   | 8.6    | m <sup>3</sup> /d |
| EF            | 365    | 365    | d/a               |
| ED            | 24     | 6      | a                 |
| BW            | 70     | 15     | kg                |
| Cancer AT     | 70*365 | 70*365 | d                 |
| Non-cancer AT | ED*365 | ED*365 | d                 |

**Table S8** Reference dose (RfD) ( $\text{mg kg}^{-1} \text{d}^{-1}$ ) and cancer slope factor (CSF) ( $\text{kg d mg}^{-1}$ ) of selected trace elements in references.

| Element | RfD                  | CSF                |
|---------|----------------------|--------------------|
| Cr      | $3 \times 10^{-3}$   | $5 \times 10^{-1}$ |
| Mn      | $1.4 \times 10^{-1}$ |                    |
| Fe      | $7 \times 10^{-1}$   |                    |
| Co      | $3 \times 10^{-4}$   |                    |
| Ni      | $2 \times 10^{-2}$   |                    |
| Cu      | $4 \times 10^{-2}$   |                    |
| Zn      | $3 \times 10^{-1}$   |                    |
| As      | $3 \times 10^{-4}$   | 1.5                |
| Pb      | $2 \times 10^{-2}$   | $5 \times 10^{-1}$ |

## References

- Chang, Y., Huang, K., Xie, M., Deng, C., Zou, Z., Liu, S., and Zhang, Y.: First long-term and near real-time measurement of trace elements in China's urban atmosphere: temporal variability, source apportionment and precipitation effect, *Atmos. Chem. Phys.*, 18, 11793-11812, 2018.
- Cui, Y., Ji, D., Chen, H., Gao, M., Maenhaut, W., He, J., and Wang, Y.: Characteristics and sources of hourly trace elements in airborne fine particles in urban Beijing, China, *J. Geophys. Res. Atmos.*, 124, 11595-11613, 2019.
- Grivas, G., Cheristanidis, S., Chaloulakou, A., Koutrakis, P., and Mihalopoulos, N.: Elemental composition and source apportionment of fine and coarse particles at traffic and urban background locations in Athens, Greece, *Aerosol Air Qual. Res.*, 18, 1642-1659, 2018.
- Li, R., Guo, J. P., Geng, G. N., Xiao, Q. Y., and Zhang, Q.: Satellite-derived long-term estimates of full-coverage PM<sub>1</sub> concentrations across China based on a stacking decision tree model, *Atmos. Environ.*, 255, 118448, 2021.
- Ma, Z. W., Liu, R. Y., Liu, Y., and Bi, J.: Effects of air pollution control policies on PM<sub>2.5</sub> pollution improvement in China from 2005 to 2017: a satellite-based perspective, *Atmos. Chem. Phys.*, 19, 6861-6877, 2019.
- Salameh, D., Detournay, A., Pey, J., Pérez, N., Liguori, F., Saraga, D., Bove, M. C., Brotto, P., Cassola, F., Massabò, D., Latella, A., Pillon, S., Formenton, G., Patti, S., Armengaud, A., Piga, D., Jaffrezo, J.L., Bartzis, J., Tolis, E., Prati, P., Querol, X., Wortham, H., and Marchand, N.: PM<sub>2.5</sub> chemical composition in five European Mediterranean cities: A 1-year study, *Atmos. Res.*, 155, 102-117, 2015.
- Sofowote, U. M., Rastogi, A. K., Deboz, J., and Hopke, P. K.: Advanced receptor modeling of near-real-time, ambient PM<sub>2.5</sub> and its associated components collected at an urban-industrial site in Toronto, Ontario, *Atmos. Pollut. Res.*, 5, 13-23, 2014.
- Visser, S., Slowik, J., Furger, M., Zotter, P., Bukowiecki, N., and Dressler, R.: Kerb and urban increment of highly time-resolved trace elements in PM<sub>10</sub>, PM<sub>2.5</sub>, and PM<sub>1.0</sub> winter aerosol in London during ClearfLo 2012, *Atmos. Chem. Phys.*, 15(5), 2367-2386. <https://doi.org/10.5194/acp-15-2367-2015>, 2015.
- Wang, Q., Qiao, L., Zhou, M., Zhu, S., Griffith, S., Li, L., and Yu, J. Z.: Source apportionment of PM<sub>2.5</sub> using hourly measurements of elemental tracers and major constituents in an urban environment: investigation of time-resolution influence, *J. Geophys. Res. Atmos.*, 123, 5284-5300, 2018.
- Zhang, J., Zhou, X., Wang, Z., Yang, L., Wang, J., and Wang, W.: Trace elements in PM<sub>2.5</sub> in Shandong Province: source identification and health risk assessment, *Sci. Total Environ.*, 621, 558-577, 2018.
